# Supplementary material for: Cancer Survivors’ Experience With Telehealth: A Systematic Review and Thematic Synthesis
Source: PubMed Central journal article supplement (PMC5259589; doi:10.2196/jmir.6575), 2017-01-09
Supplement: jmir_v19i1e11_app2.pdf [file jmir_v19i1e11_app2.pdf]

Multimedia Appendix 2. Summary of characteristics of qualitative components of publications included in the review.

| Study                                                             | Primary aim                                                                                | Survivor demographics (gender cancer type age)                           | Telehealth intervention (type purpose frequency duration)                                                                                          | Telehealth role                     | Data collection method (Analysis method)         |
|-------------------------------------------------------------------|--------------------------------------------------------------------------------------------|--------------------------------------------------------------------------|----------------------------------------------------------------------------------------------------------------------------------------------------|-------------------------------------|--------------------------------------------------|
| Beaver, Williamson, and Chalmers, 2010<br>England, United Kingdom | Patient and HCP <sup>a</sup> views on telephone follow-up posttreatment for breast cancer. | 28F <sup>b</sup><br>breast cancer<br>48-80                               | Telephone<br>Patient information or support<br>30 minutes (FNS <sup>c</sup> )<br>DNS <sup>d</sup>                                                  | Replace face-to-face follow-up care | Interviews (Content analysis)                    |
| Chambers et al, 2015<br>Australia                                 | Acceptability of telephone-delivered psychological wellness intervention.                  | 13 (GNS <sup>e</sup> )<br>lung cancer<br>65                              | Telephone<br>Cognitive behavioral therapy<br>55 minutes/week<br>6 weeks                                                                            | Remote patient support              | Interviews (Thematic analysis)                   |
| Chan et al, 2013<br>Singapore                                     | Evaluate online home monitoring + symptom management of chemotherapy patients.             | 3F, 1M<br>breast cancer<br>colorectal cancer<br>ND <sup>f</sup><br>39-59 | Web-based<br>Symptom reporting + self-care + videoconferencing<br>Daily symptom reports, 2 x video conference assessments<br>4 chemotherapy cycles | Symptom management                  | 1 open-ended survey question (Thematic analysis) |
| Cornwall, Moore, and Plant, 2008<br>England, United Kingdom       | Evaluate email communication method between nurses, patients, and carers.                  | 2M <sup>g</sup> , 2F<br>lung cancer<br>33-77                             | Email<br>Communication method<br>As and when desired by all parties<br>6 months                                                                    | Communication tool                  | Open-ended survey questions (Not specified)      |

| Study                                            | Primary aim                                                                                                                               | Survivor demographics (gender cancer type age)                | Telehealth intervention (type purpose frequency duration)                                                                                           | Telehealth role                                  | Data collection method (Analysis method)                                        |
|--------------------------------------------------|-------------------------------------------------------------------------------------------------------------------------------------------|---------------------------------------------------------------|-----------------------------------------------------------------------------------------------------------------------------------------------------|--------------------------------------------------|---------------------------------------------------------------------------------|
| Cox et al, 2008, England, United Kingdom         | Evaluate nurse led telephone intervention to encourage proactive ovarian cancer management, including physical + psychological morbidity. | 46F<br>ovarian cancer<br>stage II to IV<br>18 < 60<br>28 ≥ 60 | Telephone<br>Check symptoms/<br>recurrence + self-care<br>advice<br>20 minutes every 3<br>months or when patient<br>desires<br>DNS                  | Replacement of<br>face-to-face<br>follow-up care | Open-ended<br>survey<br>questions<br>(Content<br>analysis)                      |
| Cox and Faithfull, 2015, England, United Kingdom | Explore views/ experiences of women receiving long-term (≥ 3 years) nurse-led telephone follow-up.                                        | 11F<br>ovarian cancer<br>47-79                                | Telephone<br>Check symptoms/<br>recurrence + self-care<br>advice<br>20 minutes every 3<br>months or sooner if<br>treatment demanded<br>>3 years     | Replacement of<br>face-to-face<br>follow-up care | Interviews<br>(Interpretative<br>phenomeno-<br>logical<br>analysis)             |
| Fergus et al, 2014, Canada                       | Feasibility + acceptability of online intervention to support young couples' coping and adjustment to breast cancer.                      | 10F<br>breast cancer<br>33                                    | Web-based discussion<br>board + telephone<br>online coping/<br>adjustment intervention<br>+ 2 telephone calls<br>Weekly<br>8 weeks                  | Remote patient<br>support                        | Survey with<br>open-nded<br>questions and<br>interview<br>(Content<br>analysis) |
| Head et al, 2011, United States                  | Feasibility + acceptability of symptom management telehealth intervention during treatment for head + neck cancer.                        | 5F, 39M<br>head & neck<br>cancer<br>59                        | Device: Health Buddy<br>Education/ support +<br>symptom management +<br>self-care<br>Daily<br>Throughout treatment<br>and 2 weeks<br>posttreatment) | Symptom<br>management                            | Interviews<br>(Thematic<br>analysis)                                            |

| Study                                         | Primary aim                                                                                                       | Survivor demographics (gender cancer type age) | Telehealth intervention (type purpose frequency duration)                                                                                             | Telehealth role        | Data collection method (Analysis method)            |
|-----------------------------------------------|-------------------------------------------------------------------------------------------------------------------|------------------------------------------------|-------------------------------------------------------------------------------------------------------------------------------------------------------|------------------------|-----------------------------------------------------|
| Högberg et al, 2013, Sweden                   | Describe patient/family perspective of Web-based communication tool for psychosocial support.                     | 5F, 6M hematological cancer any stage 22-68    | Web-based Patient information or support As patient desires with nurse response within 3 days DNS                                                     | Remote patient support | Interviews (Content analysis)                       |
| Högberg et al, 2015, Sweden                   | To describe the meaning of using Web-based communication for support from a patient perspective.                  | 6F, 4M hematological cancer any stage 21-72    | Web-based Patient information or support As patient desires with nurse response within 3 days DNS                                                     | Remote patient support | Interviews (Hermeneutic approach)                   |
| Kearney et al, 2006, Scotland, United Kingdom | Patient/HCP perceptions on ease/benefits of using a symptom management handset.                                   | 5F, 10M lung cancer colorectal cancer 24-77    | Device: Handheld Computer Realtime symptom-reporting + self-care Daily reporting, DNS                                                                 | Symptom management     | Survey with open-ended question (Thematic analysis) |
| Kilbourn et al, 2013, United States           | Feasibility, acceptability + benefits of telephone-based psychosocial intervention to improve symptom management. | 8 (GNS) head & neck cancer ND 59               | Telephone-based Symptom management + needs assessment + self-care Max 8 sessions aligned with time of diagnosis + active treatment + end of treatment | Remote patient support | Interviews (Thematic analysis)                      |
| Lai et al, 2015, Hong Kong                    | Feasibility + acceptability of nurse-led care program for chemotherapy patients.                                  | 4F, 1M breast cancer colorectal cancer 42-69   | Telephone Assessment + triage + self-care 5-24 minutes, After 1 <sup>st</sup> + 2 <sup>nd</sup> chemotherapy cycles                                   | Remote patient support | Interviews (Content analysis)                       |

| Study                                        | Primary aim                                                                                                                   | Survivor demographics (gender cancer type age)                       | Telehealth intervention (type purpose frequency duration)                                                                                                                                | Telehealth role        | Data collection method (Analysis method)                         |
|----------------------------------------------|-------------------------------------------------------------------------------------------------------------------------------|----------------------------------------------------------------------|------------------------------------------------------------------------------------------------------------------------------------------------------------------------------------------|------------------------|------------------------------------------------------------------|
| Livingston et al, 2006, Australia            | Feasibility + acceptability of telephone cancer information support service.                                                  | 81M colorectal cancer prostate cancer stages 1–3 ND ANS <sup>b</sup> | Telephone<br>Discuss cancer diagnosis + treatment + management issues<br>Randomized to 4 calls; 1 call with patient left to call back if they wish; or patient required to call 6 months | Remote patient support | Interviews (Thematic analysis)                                   |
| Maguire et al, 2015, United Kingdom          | Feasibility + acceptability of ASyMS <sup>i</sup> in lung cancer patients receiving radiotherapy + clinicians providing care. | 10 (GNS) lung cancer 42-85                                           | Device: ASyMS<br>Realtime symptom-reporting + self-care<br>Daily reporting<br>Duration of radiotherapy + 1 month posttreatment)                                                          | Symptom management     | Interviews (Thematic analysis)                                   |
| McCall et al, 2008, Scotland, United Kingdom | Acceptability + usability of ASyMS in palliative care.                                                                        | 2F, 4M CNS <sup>i</sup> late stage cancer aged 40-87                 | Device: ASyMS<br>Realtime symptom-reporting + self-care<br>Daily reporting<br>30 days                                                                                                    | Symptom management     | Interviews & survey with open-ended question (Thematic analysis) |
| McCann et al, 2009, Scotland, United Kingdom | Patient and HCP perspectives/ experiences of using ASyMS.                                                                     | 12 (GNS) breast cancer lung cancer colorectal cancer ANS             | Device: ASyMS<br>Realtime symptom-reporting + self-care<br>Twice-daily reporting x 14 days,<br>Four chemotherapy cycles                                                                  | Symptom management     | Interviews (Thematic analysis)                                   |

| Study                                                  | Primary aim                                                                                                  | Survivor demographics (gender cancer type age)         | Telehealth intervention (type purpose frequency duration)                                              | Telehealth role                            | Data collection method (Analysis method)           |
|--------------------------------------------------------|--------------------------------------------------------------------------------------------------------------|--------------------------------------------------------|--------------------------------------------------------------------------------------------------------|--------------------------------------------|----------------------------------------------------|
| Ream et al, 2015, United Kingdom                       | Explore patients' perceptions of feasibility + acceptability of a fatigue management telephone intervention. | 9 (GNS) breast cancer colorectal cancer lymphoma ANS   | Telephone Fatigue self-care + activities, 3 calls, 20-40 minutes 3 treatment cycles                    | Remote patient support                     | Interviews (Not specified)                         |
| Snyder et al, 2013, United States                      | Feasibility, value, usefulness + acceptability of Patient Viewpoint website for patients and clinicians.     | 34F, 13M breast cancer prostate cancer any stage 28-81 | Web-based PRO collection Every 2 weeks DNS                                                             | Communication tool                         | Interviews (Not specified)                         |
| Stacey et al, 2016, Canada                             | Patient + family experiences with telephone cancer treatment symptom support.                                | 43 (GNS) CNS 25-83                                     | Telephone Symptom management + advice As and when patient desires DNS                                  | Remote patient support                     | Survey with open-ended question (Content analysis) |
| Williamson, Chalmers, and Beaver, 2015, United Kingdom | Patient experience of telephone follow-up for colorectal cancer.                                             | 9F, 12M colorectal cancer 6 < 60 15 ≥ 60               | Telephone Patient information or support FNS DNS                                                       | Replacement of face-to-face follow-up care | Interviews (Content analysis)                      |
| Zheng et al, 2013, China                               | Explore patient + nurse views of telephone follow up postcolostomy                                           | 4F, 7M colorectal cancer, 28-71                        | Telephone Discuss assessment + management 2-3 telephone calls within 1 month of hospital discharge DNS | Replacement of face-to-face follow-up care | Interviews (Content analysis)                      |

<sup>a</sup>HCP: health care professional.

<sup>b</sup>F: Female. <sup>c</sup>FNS: frequency not specified.

<sup>d</sup>DNS: duration not specified.

<sup>e</sup>GNS: gender not specified.

<sup>f</sup>ND: newly diagnosed.

<sup>g</sup>M: Male.

<sup>h</sup>ANS: age not specified.

<sup>i</sup>ASyMS: Advanced Symptom Management System.

<sup>j</sup>CNS: cancer no specified.
